# Supplementary material
Source: PubMed Central journal article supplement (PMC18601)

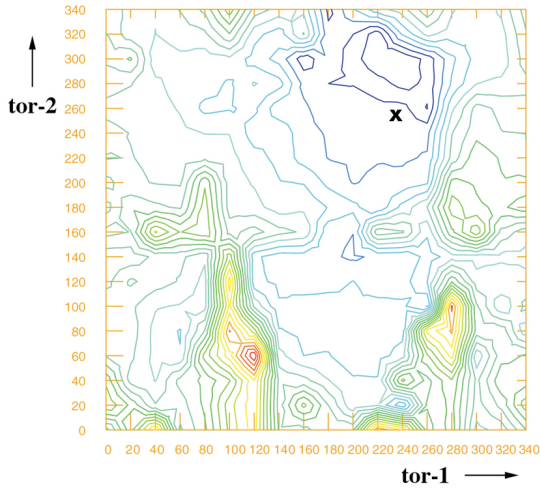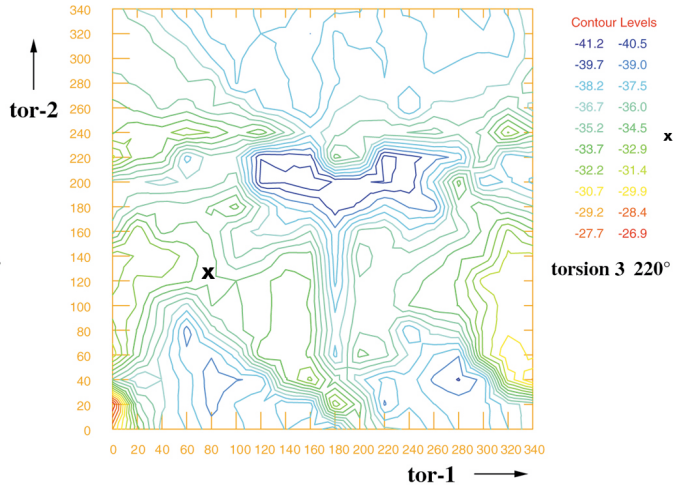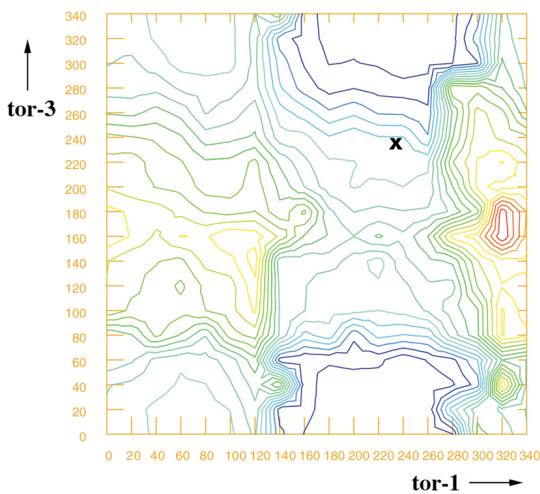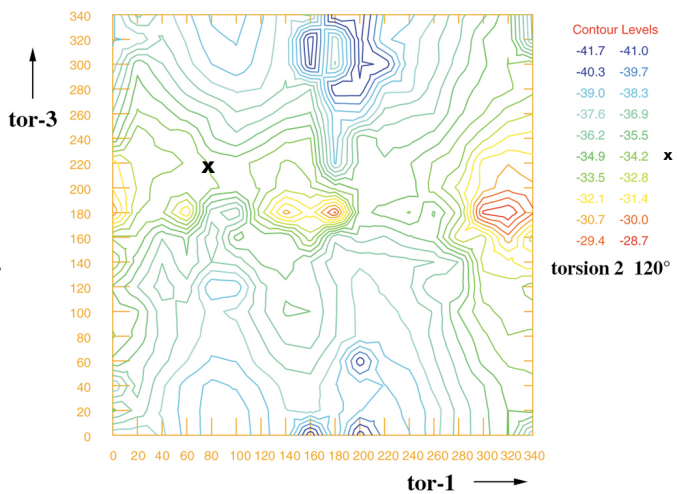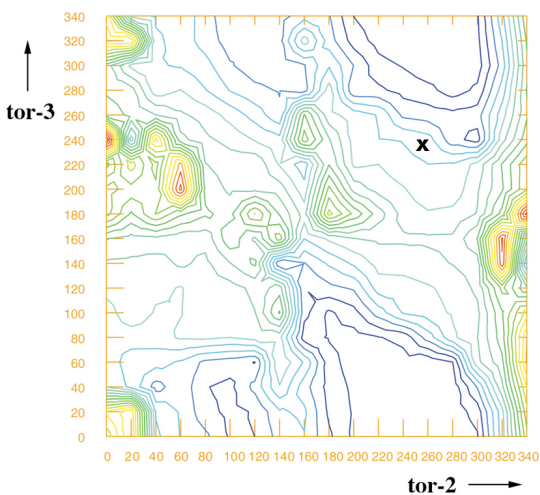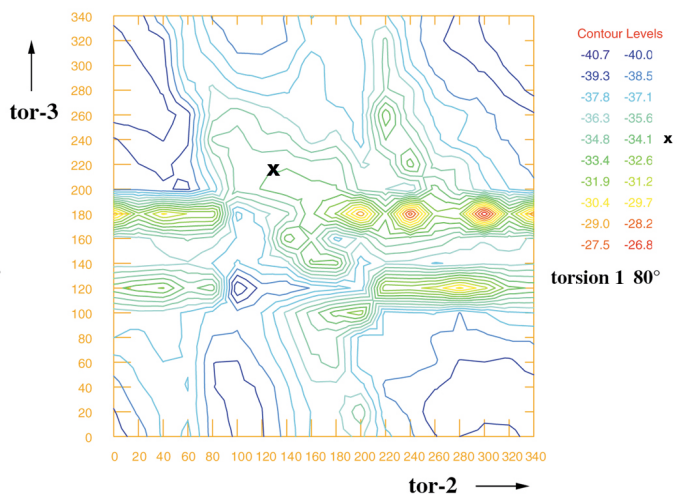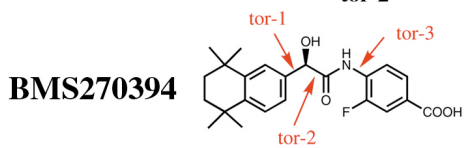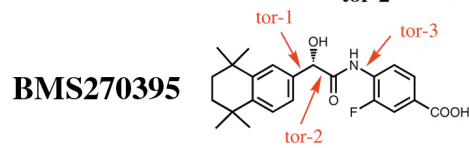

Supplement: pnas_97_12_6322__1.pdf [file pnas_97_12_6322__1.pdf]
